# Supplementary material for: Dimensionen der Gesundheitskompetenz von Viertklässler*innen
Source: Springer Nature journal article supplement (doi:10.1007/s11553-020-00822-9), 2020-12-16
Supplement: MOESM1 [file 18688262]

Anhang 1: Eingesetzte Items in den Bereichen selbstberichtete Gesundheitskompetenz, Soziodemografie, Gesundheitswissen, Literacy und Numeracy.

Zum Thema **Gesundheit** gehören verschiedene Sachen:

- Dass du nicht krank bist
- Dass du dich gut fühlst
- Sport und Bewegung
- Gesundes Essen

Über Gesundheit kannst du viel  
**lernen und herausfinden!**

| Wie einfach oder schwierig ist es für dich, ...                                  | Sehr schwierig           | Eher schwierig           | Eher einfach             | Sehr einfach             | Weiß nicht               |
|----------------------------------------------------------------------------------|--------------------------|--------------------------|--------------------------|--------------------------|--------------------------|
| ...herauszufinden, wie du bei einer Erkältung schnell wieder gesund wirst?       | <input type="checkbox"/> |
| ...herauszufinden, was du tun kannst, damit du nicht zu dick oder zu dünn wirst? | <input type="checkbox"/> |
| ...herausfinden, wie du dich am besten entspannen kannst?                        | <input type="checkbox"/> |
| ...herauszufinden, welches Essen für dich gesund ist?                            | <input type="checkbox"/> |

Manchmal hört oder liest man etwas, das man nicht sofort versteht. Auch Erwachsene sagen manchmal Wörter, die man noch nicht kennt.

Wir wollen jetzt wissen,  
**wie gut du Dinge verstehst,**  
 die du über das Thema Gesundheit hörst oder liest!

| Wie einfach oder schwierig ist es für dich, ...                                       | Sehr schwierig           | Eher schwierig           | Eher einfach             | Sehr einfach             | Weiß nicht               |
|---------------------------------------------------------------------------------------|--------------------------|--------------------------|--------------------------|--------------------------|--------------------------|
| ...zu verstehen, wann und wie du deine Medikamente nehmen sollst, wenn du krank bist? | <input type="checkbox"/> |
| ...zu verstehen, was der Arzt dir sagt?                                               | <input type="checkbox"/> |
| ...zu verstehen, warum du manchmal zum Arzt musst, auch wenn du gar nicht krank bist? | <input type="checkbox"/> |
| ...zu verstehen, warum du Impfungen brauchst?                                         | <input type="checkbox"/> |
| ...zu verstehen, was dir deine Eltern über deine Gesundheit erklären?                 | <input type="checkbox"/> |
| ...zu verstehen, warum du dich auch manchmal ausruhen musst?                          | <input type="checkbox"/> |

Nicht alles stimmt, was man über Gesundheit hört oder liest!  
 Manchmal muss man selbst **beurteilen, was richtig ist**  
 und was vielleicht eher falsch ist.

**Beurteilen, das ist....**

- entscheiden, was richtig ist
- nachdenken, was besser ist
- entscheiden, was falsch ist
- überlegen, was du glauben kannst...

| Wie einfach oder schwierig ist es für dich, ...                          | Sehr schwierig           | Eher schwierig           | Eher einfach             | Sehr einfach             | Weiß nicht               |
|--------------------------------------------------------------------------|--------------------------|--------------------------|--------------------------|--------------------------|--------------------------|
| ...zu beurteilen, was viel und was wenig hilft, damit du gesund bleibst? | <input type="checkbox"/> |

Oft reicht es nicht, nur zu wissen, was gesund ist.  
**Manche Sachen muss man auch machen!**  
 Wie ist das bei dir?

| Wie einfach oder schwierig ist es für dich, ...                     | Sehr schwierig           | Eher schwierig           | Eher einfach             | Sehr einfach             | Weiß nicht               |
|---------------------------------------------------------------------|--------------------------|--------------------------|--------------------------|--------------------------|--------------------------|
| ...zu tun, was deine Eltern dir sagen, um wieder gesund zu werden?  | <input type="checkbox"/> |
| ...deine Medizin so einzunehmen, wie man es dir gesagt hat?         | <input type="checkbox"/> |
| ...dich daran zu halten, was du im Verkehrsunterricht gelernt hast? | <input type="checkbox"/> |
| ...dich gesund zu ernähren?                                         | <input type="checkbox"/> |

Erzähl' uns doch etwas von dir!

|                                                                                                                                               |                                                                                               |                                   |
|-----------------------------------------------------------------------------------------------------------------------------------------------|-----------------------------------------------------------------------------------------------|-----------------------------------|
| Bist du ein Mädchen oder ein Junge?                                                                                                           | Mädchen<br><input type="checkbox"/>                                                           | Junge<br><input type="checkbox"/> |
| Wie alt bist du?<br>(Schreibe rechts dein Alter als Zahl hin!)                                                                                |  _____ Jahre |                                   |
| Welche Sprache sprichst du <u>mit deiner Mutter</u> die meiste Zeit?<br><br>(wenn ihr gleich oft in zwei Sprachen redet, schreibe beide hin!) |              |                                   |
| Welche Sprache sprichst du <u>mit deinem Vater</u> die meiste Zeit?<br><br>(wenn ihr gleich oft in zwei Sprachen redet, schreibe beide hin!)  |            |                                   |

Jetzt würden wir gerne etwas über dein Zuhause erfahren. (Damit meinen wir den Ort, wo du meistens übernachtet.)

|                                     |                          |                          |                          |                          |
|-------------------------------------|--------------------------|--------------------------|--------------------------|--------------------------|
|                                     | Nein                     | Ja, eins                 | Ja, zwei oder mehr       | Weiß nicht               |
| Hat deine Familie <u>ein Auto</u> ? | <input type="checkbox"/> | <input type="checkbox"/> | <input type="checkbox"/> | <input type="checkbox"/> |

|                                     |                          |                          |                          |
|-------------------------------------|--------------------------|--------------------------|--------------------------|
|                                     | Nein                     | Ja                       | Weiß nicht               |
| Hast du <u>ein eigenes Zimmer</u> ? | <input type="checkbox"/> | <input type="checkbox"/> | <input type="checkbox"/> |

|                                                                                                                                                        | Keinen                   | Einen                    | Zwei                     | Mehr als zwei            | Weiß nicht               |
|--------------------------------------------------------------------------------------------------------------------------------------------------------|--------------------------|--------------------------|--------------------------|--------------------------|--------------------------|
| Wie viele <u>Computer</u> gibt es bei dir zu Hause?<br>(Zähle hierbei Laptops und Tablets mit, aber <b>nicht</b> Spielkonsolen und Smartphones/Handys) | <input type="checkbox"/> |

|                                                                                                                         | Keins                    | Eins                     | Zwei                     | Mehr als zwei            | Weiß nicht               |
|-------------------------------------------------------------------------------------------------------------------------|--------------------------|--------------------------|--------------------------|--------------------------|--------------------------|
| Wie viele <u>Badezimmer</u> gibt es bei dir zu Hause?<br>(Zimmer mit einer Badewanne oder einer Dusche oder mit beidem) | <input type="checkbox"/> |

|                                                     | Nein                     | Ja                       | Weiß nicht               |
|-----------------------------------------------------|--------------------------|--------------------------|--------------------------|
| Gibt es bei dir zu Hause eine Geschirrspülmaschine? | <input type="checkbox"/> | <input type="checkbox"/> | <input type="checkbox"/> |

|                                                                                                             | Gar nicht                | Einmal                   | Zweimal                  | Mehr als zweimal         | Weiß nicht               |
|-------------------------------------------------------------------------------------------------------------|--------------------------|--------------------------|--------------------------|--------------------------|--------------------------|
| Wie oft bist du im letzten Jahr mit deiner Familie zum Urlaub in ein anderes Land als Deutschland gefahren? | <input type="checkbox"/> |

Jetzt haben wir ein kleines Rätsel für dich!  
Kreuze die richtige Antwort an!

|                                                                                     | Richtig                  | Falsch                   | Weiß nicht               |
|-------------------------------------------------------------------------------------|--------------------------|--------------------------|--------------------------|
| Wenn auf einem Getränk "weniger Kalorien" steht, dann ist es auf jeden Fall gesund. | <input type="checkbox"/> | <input type="checkbox"/> | <input type="checkbox"/> |
| Man kann andere Menschen anstecken, wenn man Durchfall hat.                         | <input type="checkbox"/> | <input type="checkbox"/> | <input type="checkbox"/> |
| Man kann auch eine Erkältung kriegen, wenn man sich immer warm anzieht.             | <input type="checkbox"/> | <input type="checkbox"/> | <input type="checkbox"/> |

|                                                                                | 111                      | 11833                    | 112                      | Weiß nicht               |
|--------------------------------------------------------------------------------|--------------------------|--------------------------|--------------------------|--------------------------|
| Welche Telefonnummer musst du wählen, wenn du einen Krankenwagen rufen willst? | <input type="checkbox"/> | <input type="checkbox"/> | <input type="checkbox"/> | <input type="checkbox"/> |

|                                                           | Etwa drei<br>Gläser Wasser<br>(etwa 0,6 Liter) | Etwa sechs<br>Gläser Wasser<br>(etwa 1,2 Liter) | Etwa acht<br>Gläser Wasser<br>(etwa 1,6 Liter) | Weiß nicht               |
|-----------------------------------------------------------|------------------------------------------------|-------------------------------------------------|------------------------------------------------|--------------------------|
| Wieviel Wasser solltest du an einem normalen Tag trinken? | <input type="checkbox"/>                       | <input type="checkbox"/>                        | <input type="checkbox"/>                       | <input type="checkbox"/> |

Gleich siehst du Sätze, in denen Wörter fehlen. Wo eine Lücke im Satz ist, siehst du auch immer vier Wörter. Wähle für jede Lücke das Wort aus, das am besten passt! Hierzu machst du einfach einen **Kreis um den Buchstaben vor dem richtigen Wort**.

Hier ist ein Beispiel:

|                                           |                                          |
|-------------------------------------------|------------------------------------------|
| In jede _____                             | kommt ein _____                          |
| a. Karte                                  | a. Mensch                                |
| b. Sonne                                  | <input checked="" type="radio"/> b. Wort |
| <input checked="" type="radio"/> c. Lücke | c. Tier                                  |
| d. Kurve                                  | d. Schiff                                |

Alles klar? Los geht's!



## Was ist eine Impfung?

Gegen viele \_\_\_\_\_ kann man sich impfen \_\_\_\_\_.

- |                |           |
|----------------|-----------|
| a. Unfälle     | a. haben  |
| b. Krankheiten | b. müssen |
| c. Wartezimmer | c. können |
| d. Katzen      | d. lassen |

Die Impfung \_\_\_\_\_ eine ganz \_\_\_\_\_ Erkrankung in deinem Körper.

- |               |            |
|---------------|------------|
| a. riecht     | a. leckere |
| b. ist        | b. dunkle  |
| c. verursacht | c. laute   |
| d. stört      | d. leichte |

Meistens \_\_\_\_\_ du gar \_\_\_\_\_ davon, ...

- |              |           |
|--------------|-----------|
| a. tust      | a. nichts |
| b. merkst    | b. viel   |
| c. fliegst   | c. keines |
| d. schmeckst | d. alles  |

... weil der \_\_\_\_\_ mit diesen wenigen Keimen leicht fertig \_\_\_\_\_.

- |           |          |
|-----------|----------|
| a. Lehrer | a. geht  |
| b. Körper | b. kann  |
| c. Zeh    | c. wird  |
| d. Finger | d. macht |

Von nun an bist du eine bestimmte \_\_\_\_\_ vor dieser Krankheit \_\_\_\_\_.

- |           |              |
|-----------|--------------|
| a. Person | a. gegangen  |
| b. Namen  | b. geschützt |
| c. Zeit   | c. fertig    |
| d. Summe  | d. gewaschen |

\_\_\_\_\_ lange, \_\_\_\_\_ ist bei jeder Krankheit unterschiedlich.

- |        |        |
|--------|--------|
| a. Wo  | a. das |
| b. Was | b. der |
| c. Wer | c. die |
| d. Wie | d. er  |

Stell dir vor, du bist krank und deine Eltern sagen dir: „Du musst alle 6 Stunden eine Tablette nehmen“.

**Frage:** Wenn du um 7 Uhr morgens die erste Tablette nimmst, wann musst du dann die zweite Tablette nehmen?

**Antwort:** Um \_\_\_\_\_ Uhr

Weiß nicht

Deine normale Körpertemperatur liegt zwischen 36°C (Grad Celsius) und 37°C.

Stell dir vor, deine Körpertemperatur ist heute 39°C.

Wenn das heute deine Körpertemperatur ist, ist sie dann normal?

Ja

Nein

Weiß nicht

Stell dir vor, du kriegst diesen Brief von einem Sportverein:

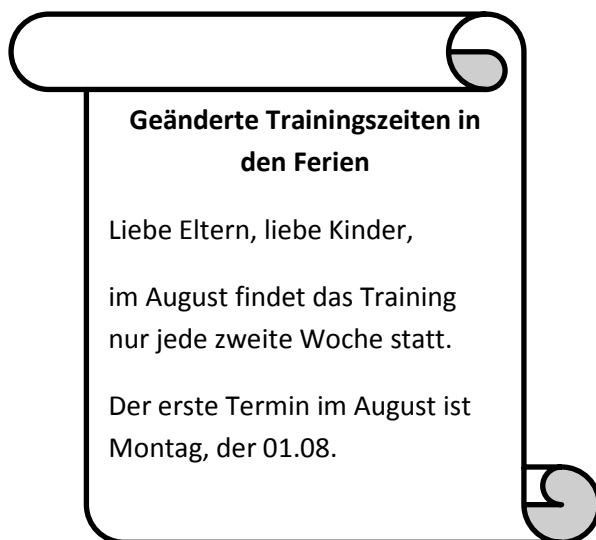

**Frage:** An welchem Tag (Datum) findet das zweite Training im August statt?

**Antwort:** \_\_\_\_\_
